# Supplementary material for: Rewiring Neuronal Glycerolipid Metabolism Determines the Extent of Axon Regeneration
Source: PubMed Central journal article supplement (PMC6975164; doi:10.1016/j.neuron.2019.10.009), 2020-01-22
Supplement: mmc1.pdf [file mmc1.pdf]

**Neuron, Volume 105**

**Supplemental Information**

**Rewiring Neuronal Glycerolipid Metabolism**

**Determines the Extent of Axon Regeneration**

**Chao Yang, Xu Wang, Jianying Wang, Xuejie Wang, Weitao Chen, Na Lu, Symeon Siniossoglou, Zhongping Yao, and Kai Liu**

## **SUPPLEMENTAL INFORMATION**

### **Rewiring neuronal glycerolipid metabolism determines the extent of axon regeneration**

Chao Yang, Xu Wang, Jianying Wang, Xuejie Wang, Weitao Chen, Na Lu, Symeon Siniosoglou, Zhongping Yao, Kai Liu

**Supplemental Figures 1-7**

**Supplemental Tables 1-5**

**Figure S1. In vitro screening and in vivo validation of lipin1 as an intrinsic suppressor of axon regeneration, Related to Figure 1.**

(A) Time course of the in-vivo optic nerve injury model and the in-vitro DRG replating model. (B) Quantification of the axon elongation by in vitro screening of cholesterol and fatty acid metabolic genes in adult DRG neurons. We tested 6 genes including *Hmgcr1*, *Hmgcs*, *Fdft1*, *CD36*, *Acc1*, *Acc2*. *Hmgcr1*: 3-hydroxy-3-methylglutaryl-coenzyme A reductase-1. *Hmgcs*: 3-Hydroxy-3-Methylglutaryl-CoA Synthase. *Fdft1*: Farnesyl-Diphosphate Farnesyltransferase 1. *CD36*: Fatty acid translocase. *Acc*: Acetyl-CoA carboxylase. Adult DRG neurons were dissociated and transfected with the plasmids for three days. Neurons were then replated and fixed 24 h after replating. DRG neurites were visualized by Tuj1 staining. Three mice and 10-20 neurons from each mouse were quantified in each group. ANOVA followed by Dunnett's test. (C) Retinal sections from control and lipin1 KD mice stained with Tuj1 antibody (green) and lipin1 antibody (red). Scale bar: 10  $\mu$ m. (D) Whole-mount retinas from control and lipin1 KD mice at 2 WPI with Tuj1 (green) staining to show the surviving RGCs. Scale bar: 50  $\mu$ m. (E) Quantification of RGC survival in (D). Student's t-test. ns, not significant. (F) Gel images of T7E1-treated PCR products amplified from the target sites of lipin1 in Neuro2A cells transfected by SpCas9 and corresponding sgRNA. (G) Retinal sections from Rosa26-Cas9 mice injected with either AAV-control-sgRNA or AAV-lipin1-sgRNA and stained for Tuj1 (green) and lipin1 (red). Scale bar: 50  $\mu$ m. Arrows indicate lipin1 negative RGCs. (H) Quantification of lipin1 negative RGCs from Rosa26-Cas9 mice injected with either AAV-control-sgRNA or AAV-lipin1-sgRNA. \*\*  $P \leq 0.01$ , Student's t-test. (I) Quantification of surviving RGCs from Rosa26-Cas9 mice injected with either AAV-control-sgRNA or AAV-lipin1-sgRNA. ns, not significant, Student's t-test. (J) Quantification of expression of lipin2 in sorted RGCs detected by qRT-PCR. Each sample was run in quadruplicate in each assay. GAPDH was used as the endogenous control. ns, not significant, Student's t-test. (K) Sections of optic nerves from Rosa26-Cas9 mice at 2 WPI injected with respective AAVs. Scale bar: 100  $\mu$ m. (L) Number of regenerating axons at the indicated distances distal to the lesion site. \*\*  $P \leq 0.01$ , ANOVA followed by Tukey's test, n= 5 mice. (M) Sections of optic

nerve from *pten* floxed mice at 2 WPI injected with AAV-Cre combined with either AAV-control or lipin1-shRNA. Scale bar: 100  $\mu$ m. (N) Number of regenerating axons at indicated distances distal to the lesion site. \*  $P \leq 0.05$ , ANOVA followed by Tukey's test,  $n = 6$  mice. (O) Validation of the KD efficiency of two lipin1 shRNA by doing western blot in Neuro2A cells after transfection. GAPDH was used as the loading control. Three batches of experiments were used for quantification. \*\*  $P \leq 0.01$ , \*  $P \leq 0.05$ , ANOVA followed by Tukey's test. (P) Number of regenerating axons from WT mice at 2 WPI injected with AAV-control or lipin1-shRNA at indicated distances from the lesion site. \*\*  $P \leq 0.01$ , \*  $P \leq 0.05$ , ANOVA followed by Tukey's test,  $n = 6$  mice. Error bars indicate SEM.

**Figure S2. Selective regulation of lipin1 levels in different types of RGCs after optic nerve injury, Related to Figure 2.**

(A) Whole-mount retinas from *Opn4*-GFP mice three days after axotomy or sham surgery were collected and stained for DAPI (blue) and lipin1 (red). GFP (green) labeled M1-M3 ipRGCs. Scale bar: 50  $\mu$ m. (B) Percentage of M1-M3 ipRGCs with a low or high lipin1 level indicated by lipin1 staining. ANOVA followed by Bonferroni's test. (C) Whole-mount retinas from WT mice three days after axotomy or sham surgery were collected and stained for DAPI (blue), TBR2 (green) and lipin1 (red). Scale bar: 50  $\mu$ m. (D) Percentage of TBR2+ RGCs with a low or high lipin1 level indicated by lipin1 staining. ANOVA followed by Bonferroni's test. (E) A whole-mount retina from a mouse with AAV-lipin1-shRNA injection showing regenerating RGCs retrogradely labeled with FG 2 WPI. The retina was stained for SMI32 (red) and FG (green). Scale bar: 50  $\mu$ m. (F) Whole-mount retinas with *Pten* deletion, CNTF overexpression or from control mice with AAV-GFP injection three days after optic nerve crush were collected and stained with SMI32 (green) and lipin1 (red) antibodies. Scale bar: 50  $\mu$ m. Zoom-in images are shown in the right panel. Scale bar: 10  $\mu$ m. (G) Percentages of  $\alpha$ RGCs with a low or high lipin1 level indicated by lipin1 staining. \*\*  $P \leq 0.01$ , ANOVA followed by Bonferroni's test. Error bars indicate SEM.

**Figure S3. Lipin1 inhibits axon elongation in vitro through its phosphatidate phosphatase activity and regulates glycerolipid metabolism in neurons, Related to Figure 3.**

(A) A whole-mount retina from WT mice injected with AAV-lipin1-shRNA and AAV-lipin1-WT with Tuj1 (gray) and HA-tag (red) staining. AAV-lipin1-shRNA-infected RGCs were labeled by GFP (green) and AAV-lipin1-WT-infected RGCs were labeled by HA-tag (red). Scale bar: 50  $\mu\text{m}$ . (B) Quantification of surviving RGCs from WT mice at 2 WPI, injected with AAV-lipin1-shRNA combined with AAV-GFP, AAV-lipin1-WT, AAV-lipin1-PAPm or AAV-lipin1- $\Delta\text{NLS}$ . Tuj1 staining was used to label RGCs. ANOVA followed by Dunnett's test. (C) Adult DRG neurons were dissociated and cultured with different AAVs for 10 days. Neurons were then replated and fixed 24 h later. DRG neurites were visualized by Tuj1 staining. Quantification of the length of the longest axon for each DRG neuron in respective groups. \*\*  $P \leq 0.01$ , \*  $P \leq 0.05$ , ANOVA followed by Tukey's test. (D) Representative images of cortical neurons with DMSO vehicle or AraC treatment. Neurons were stained for Tuj1 (red) or GFAP (green). Scale bar: 400  $\mu\text{m}$ . (E-H) Levels of individual TG, PC, PE, CE, and FA species normalized to the total protein from either Ctrl or lipin1-shRNA group. The molecular species are indicated as the total number of carbons: the number of double bonds. \*\*  $P \leq 0.01$ , \*  $P \leq 0.05$ , t-test. Error bars indicate SEM.

**Figure S4. The knockdown efficacy of shRNAs against *Atgl* and *Ddhd2*, and regeneration requires TG hydrolysis, Related to Figure 4.**

(A) Validation of *Atgl* shRNA efficiency in Neuro2A cells. Western blots of lysates of N2a cells transfected with control or *Atgl* shRNA for two days are shown. GAPDH was used as the loading control. (B) Quantification of band intensity in (A). Three batches of experiments were used for quantification. \*  $P \leq 0.05$ , Student's t-test. (C) Validation of *Ddhd2* shRNA efficiency in Neuro2A cells. Shown are western blots of lysates of N2a cells transfected with control or *Ddhd2* shRNA for two days. GAPDH was used as the loading control. (D) Quantification of band intensity in (C). Three batches of experiments were used for quantification. \*  $P \leq 0.05$ , Student's t-test. (E) A whole-mount retina from WT mice injected with AAV-lipin1-sgRNA and AAV-*Atgl*-

shRNA with Tuj1 (gray) staining. AAV- lipin1-sgRNA -infected RGCs were labeled by mCherry (red) and AAV-*Atgl*-shRNA-infected RGCs were labeled by GFP (green). Scale bar: 50  $\mu$ m. (F) Quantification of surviving RGCs at 2 WPI, injected with the corresponding AAVs. Tuj1 staining was used to label RGCs. ANOVA followed by Dunnett's test. (G) Quantification of surviving RGCs from the respective groups. ANOVA followed by Dunnett's test. (H) Sections of optic nerves from WT mice at 2 WPI injected with AAV-CNTF combined with either AAV-control or *Atgl*-shRNA. Scale bar: 100  $\mu$ m. (I) Number of regenerating axons at indicated distances from the lesion site. \*\*  $P \leq 0.01$ , ANOVA followed by Bonferroni's test, n= 6 mice. (J) Sections of optic nerves from pten floxed mice at 2 WPI injected with AAV-Cre combined with either AAV-control or *Atgl*-shRNA. Scale bar: 100  $\mu$ m. (K) Number of regenerating axons at indicated distances distal to the lesion site. \*\*  $P \leq 0.01$ , ANOVA followed by Bonferroni's test, n= 6 mice.

**Figure S5. TG synthesis inhibition promotes axon elongation in vitro, and regeneration requires TG hydrolysis, Related to Figure 5.**

(A) Representative images of replated neurons from the respective groups with Tuj1 staining. Adult DRG neurons were dissociated and cultured with the respective drug for five days. Neurons were then replated and fixed 24 h later. DRG neurites were visualized by Tuj1 staining. Scale bar: 400  $\mu$ m. (B) Quantification of the length of the longest axon for each DRG neuron in (A). Three mice and 10-20 neurons from each mouse were quantified in each group. \*  $P \leq 0.05$ , ANOVA followed by Dunnett's test. (C) Representative images of replated neurons from the respective groups with Tuj1 staining. Adult DRG neurons were dissociated and cultured with different AAV shRNA for 10 days. Neurons were then replated and fixed 24 h later. DRG neurites were visualized by Tuj1 staining. Scale bar: 400  $\mu$ m. (D) Quantification of the lengths of the longest axon for each DRG neuron in (C). Ten to twenty cells from each mouse and 3 mice were quantified in each group. \*\*  $P \leq 0.01$ , \*  $P \leq 0.05$ , ANOVA followed by Dunnett's test. (E) Gel images of T7E1-treated PCR products amplified from the target sites of *Dgat1* or *Dgat2* in Neuro2A cells transfected by SpCas9 and corresponding sgRNA. (F) Quantification of whole-mount retinas from respective groups at 2 WPI. Tuj1 staining to show the number of surviving RGCs. ANOVA

followed by Dunnett's test. (G) Sections of optic nerves from Rosa26-Cas9 mice at 2 WPI, injected with AAV-*Dgat1* or *Dgat2*-sgRNA combined with AAV-control or *Atgl* shRNA. Axons were labeled by CTB-FITC. Scale bar: 100  $\mu$ m. (H) Quantification of whole-mount retinas from the respective groups at 2 WPI, with Tuj1 staining to show the number of surviving RGCs. ANOVA followed by Dunnett's test. (I) Number of regenerating axons at the indicated distances distal to the lesion site. \*\*  $P \leq 0.01$ , \*  $P \leq 0.05$ , ANOVA followed by Tukey's test, n= 5 mice. Error bars indicate SEM.

**Figure S6. The effect of knocking down individual PL biosynthesis genes on axon elongation in vitro and axon regeneration induced by *Dgat1* depletion; Expression of the glycerolipid pathway enzymes in subtypes of RGCs after injury, Related to Figure 6.**

(A) Representative images of replated neurons from the respective groups with Tuj1 staining. Adult DRG neurons were dissociated and cultured with the respective virus for 10 days. Neurons were then replated and fixed 24 h later. DRG neurites were visualized by Tuj1 staining. Scale bar: 400  $\mu$ m. (B) Quantification of the lengths of the longest axon for each DRG neuron in (A) ANOVA followed by Dunnett's test. (C) Quantification of axon regeneration in injured optic nerves from WT mice injected with the corresponding virus. Shown are numbers of regenerating axons at the indicated distances distal to the lesion site. ANOVA followed by Tukey's test. n= 6 mice. (D) Quantification of whole-mount retinas from the respective groups at 2 WPI, with Tuj1 staining to show the number of surviving RGCs. ANOVA followed by Dunnett's test. (E) Quantification of axon regeneration in injured optic nerves from Rosa26-Cas9 mice injected with the corresponding virus. Shown are numbers of regenerating axons at the indicated distances distal to the lesion site. \*\*  $P \leq 0.01$ , ANOVA followed by Tukey's test, n= 6 mice. (F) Quantification of axon regeneration in injured optic nerves from WT mice injected with AAV-CNTF and AAV-shCtrl or AAV-sh*Pcyt1b*. Shown are numbers of regenerating axons at the indicated distances distal to the lesion site. \*\*  $P \leq 0.01$ , ANOVA followed by Bonferroni's test, n= 6 mice. (G) Quantification of axon regeneration in injured optic nerves from *Pten*-floxed mice injected with AAV-Cre and AAV-shCtrl or AAV-sh*Pcyt1b*. Shown are numbers of regenerating axons at the indicated distances distal to the lesion site. \*\*  $P \leq 0.01$ ,

ANOVA followed by Bonferroni's test, n= 3 mice. (H) A whole-mount retina from WT mice injected with AAV-*Pcyt2* with Tuj1 (green) and HA-tag (red) staining. Scale bar: 50  $\mu$ m. (I) Quantification of expression of different glycerolipid pathway enzymes in  $\alpha$ RGCs or M1-M3 ipRGCs detected by qRT-PCR. 12-15 cells were in each group and each cell was run in two replicates. \*\*  $P \leq 0.01$ , \*  $P \leq 0.05$ , ANOVA followed by Tukey's test. Error bars indicate SEM.

**Figure S7. Lipin1 levels are maintained in DRG neurons after axotomy and the effect of lipin1 KD on the peripheral axon regeneration, Related to Figure 7.**

(A) DRG sections from WT animals three days after sciatic nerve crush or sham surgery, stained with Tuj1 (green) or lipin1 (red) antibodies. Scale bar: 100  $\mu$ m. Zoomed-in images are shown in the lower panel. Scale bar: 20  $\mu$ m. (B) DRG sections from WT animals 4 weeks after AAV-lipin1 shRNA intraspinal injection. Sections were stained for GFP (green) and Tuj1 (red). Scale bar: 200  $\mu$ m. (C) Sections of sciatic nerves 3 days after injury from WT animals with AAV-ctrl or lipin1 shRNA intraspinal injection. Axons are visualized by SCG10 staining. Scale bar: 1mm. (D) Quantification of regenerating sensory axons in (B). ns, not significant, Student's t-test. (E) Quantification of the length of the longest axon from the replated neurons with AAV-shCtrl, AAV-shLipin1 or AAV-sh*Ddhd2* treatment. Three mice and 10-20 cells from each mouse were quantified in each group. \*\*  $P \leq 0.01$ , ANOVA followed by Dunnett's test. (F) Time course of compound delivery and in-vivo sciatic nerve injury model. (G) DRG sections from WT animals with respective compound injection at two days after sciatic nerve crush, stained with Tuj1 (green) or cleaved caspase3 (red) antibodies. Scale bar: 200  $\mu$ m.



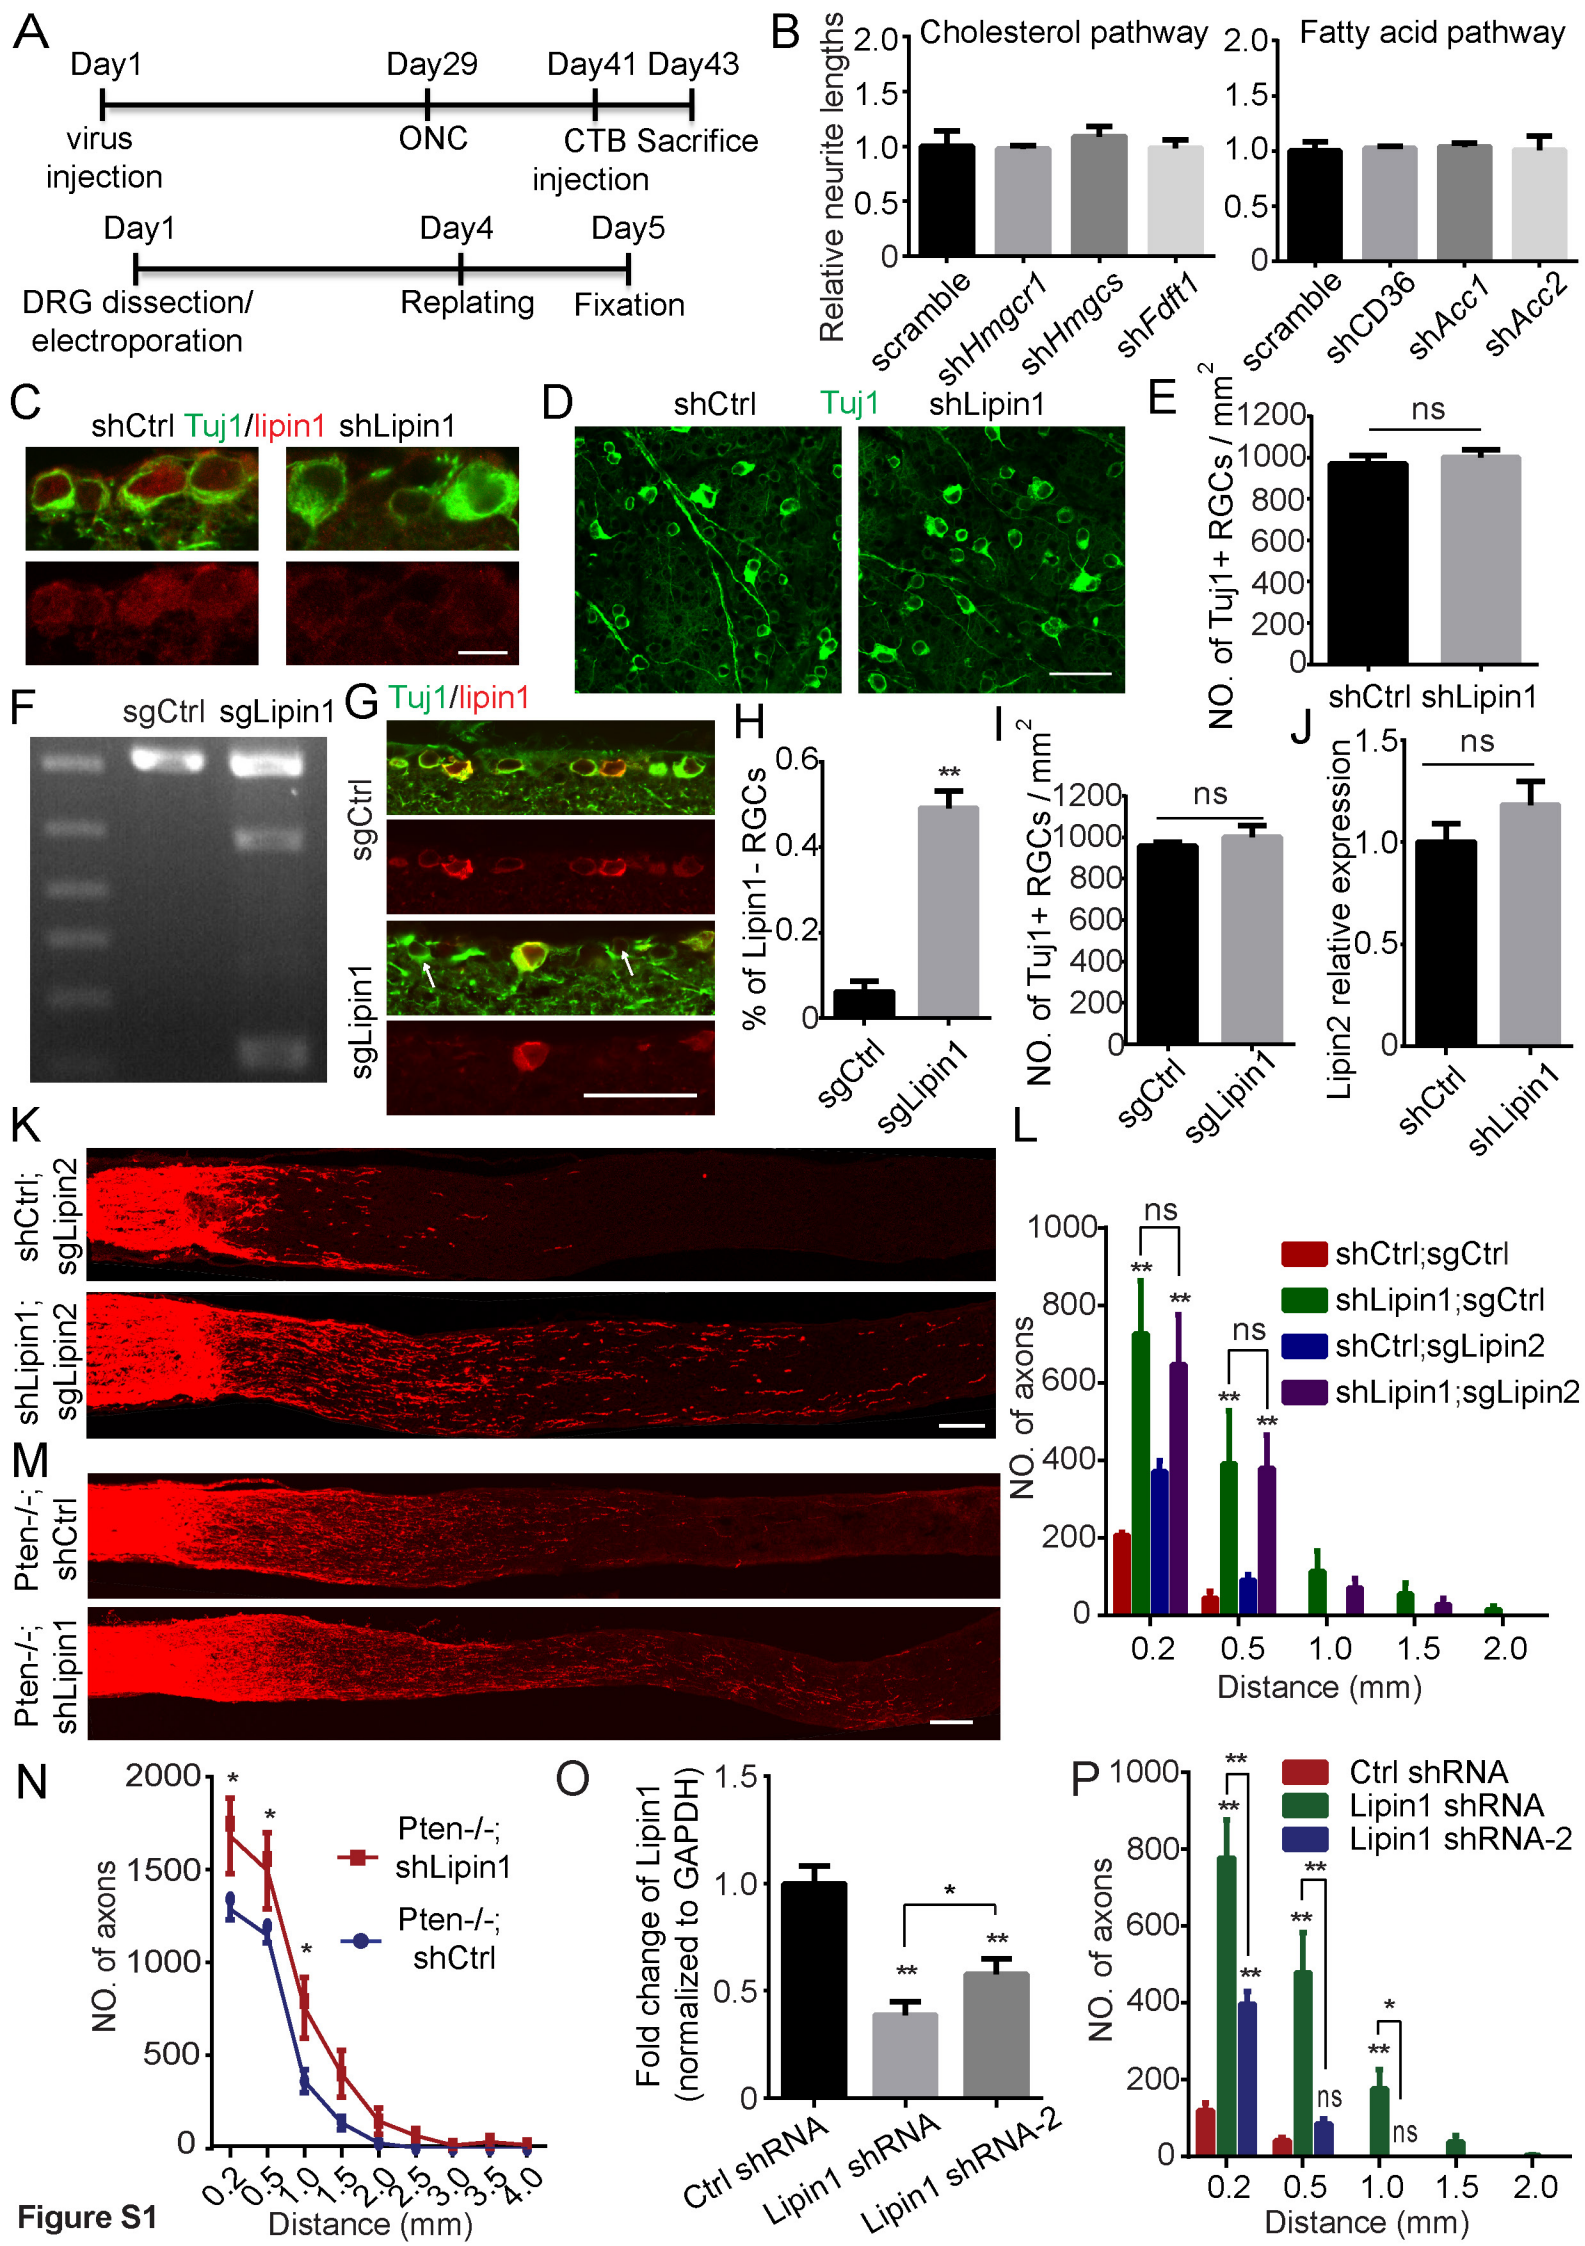

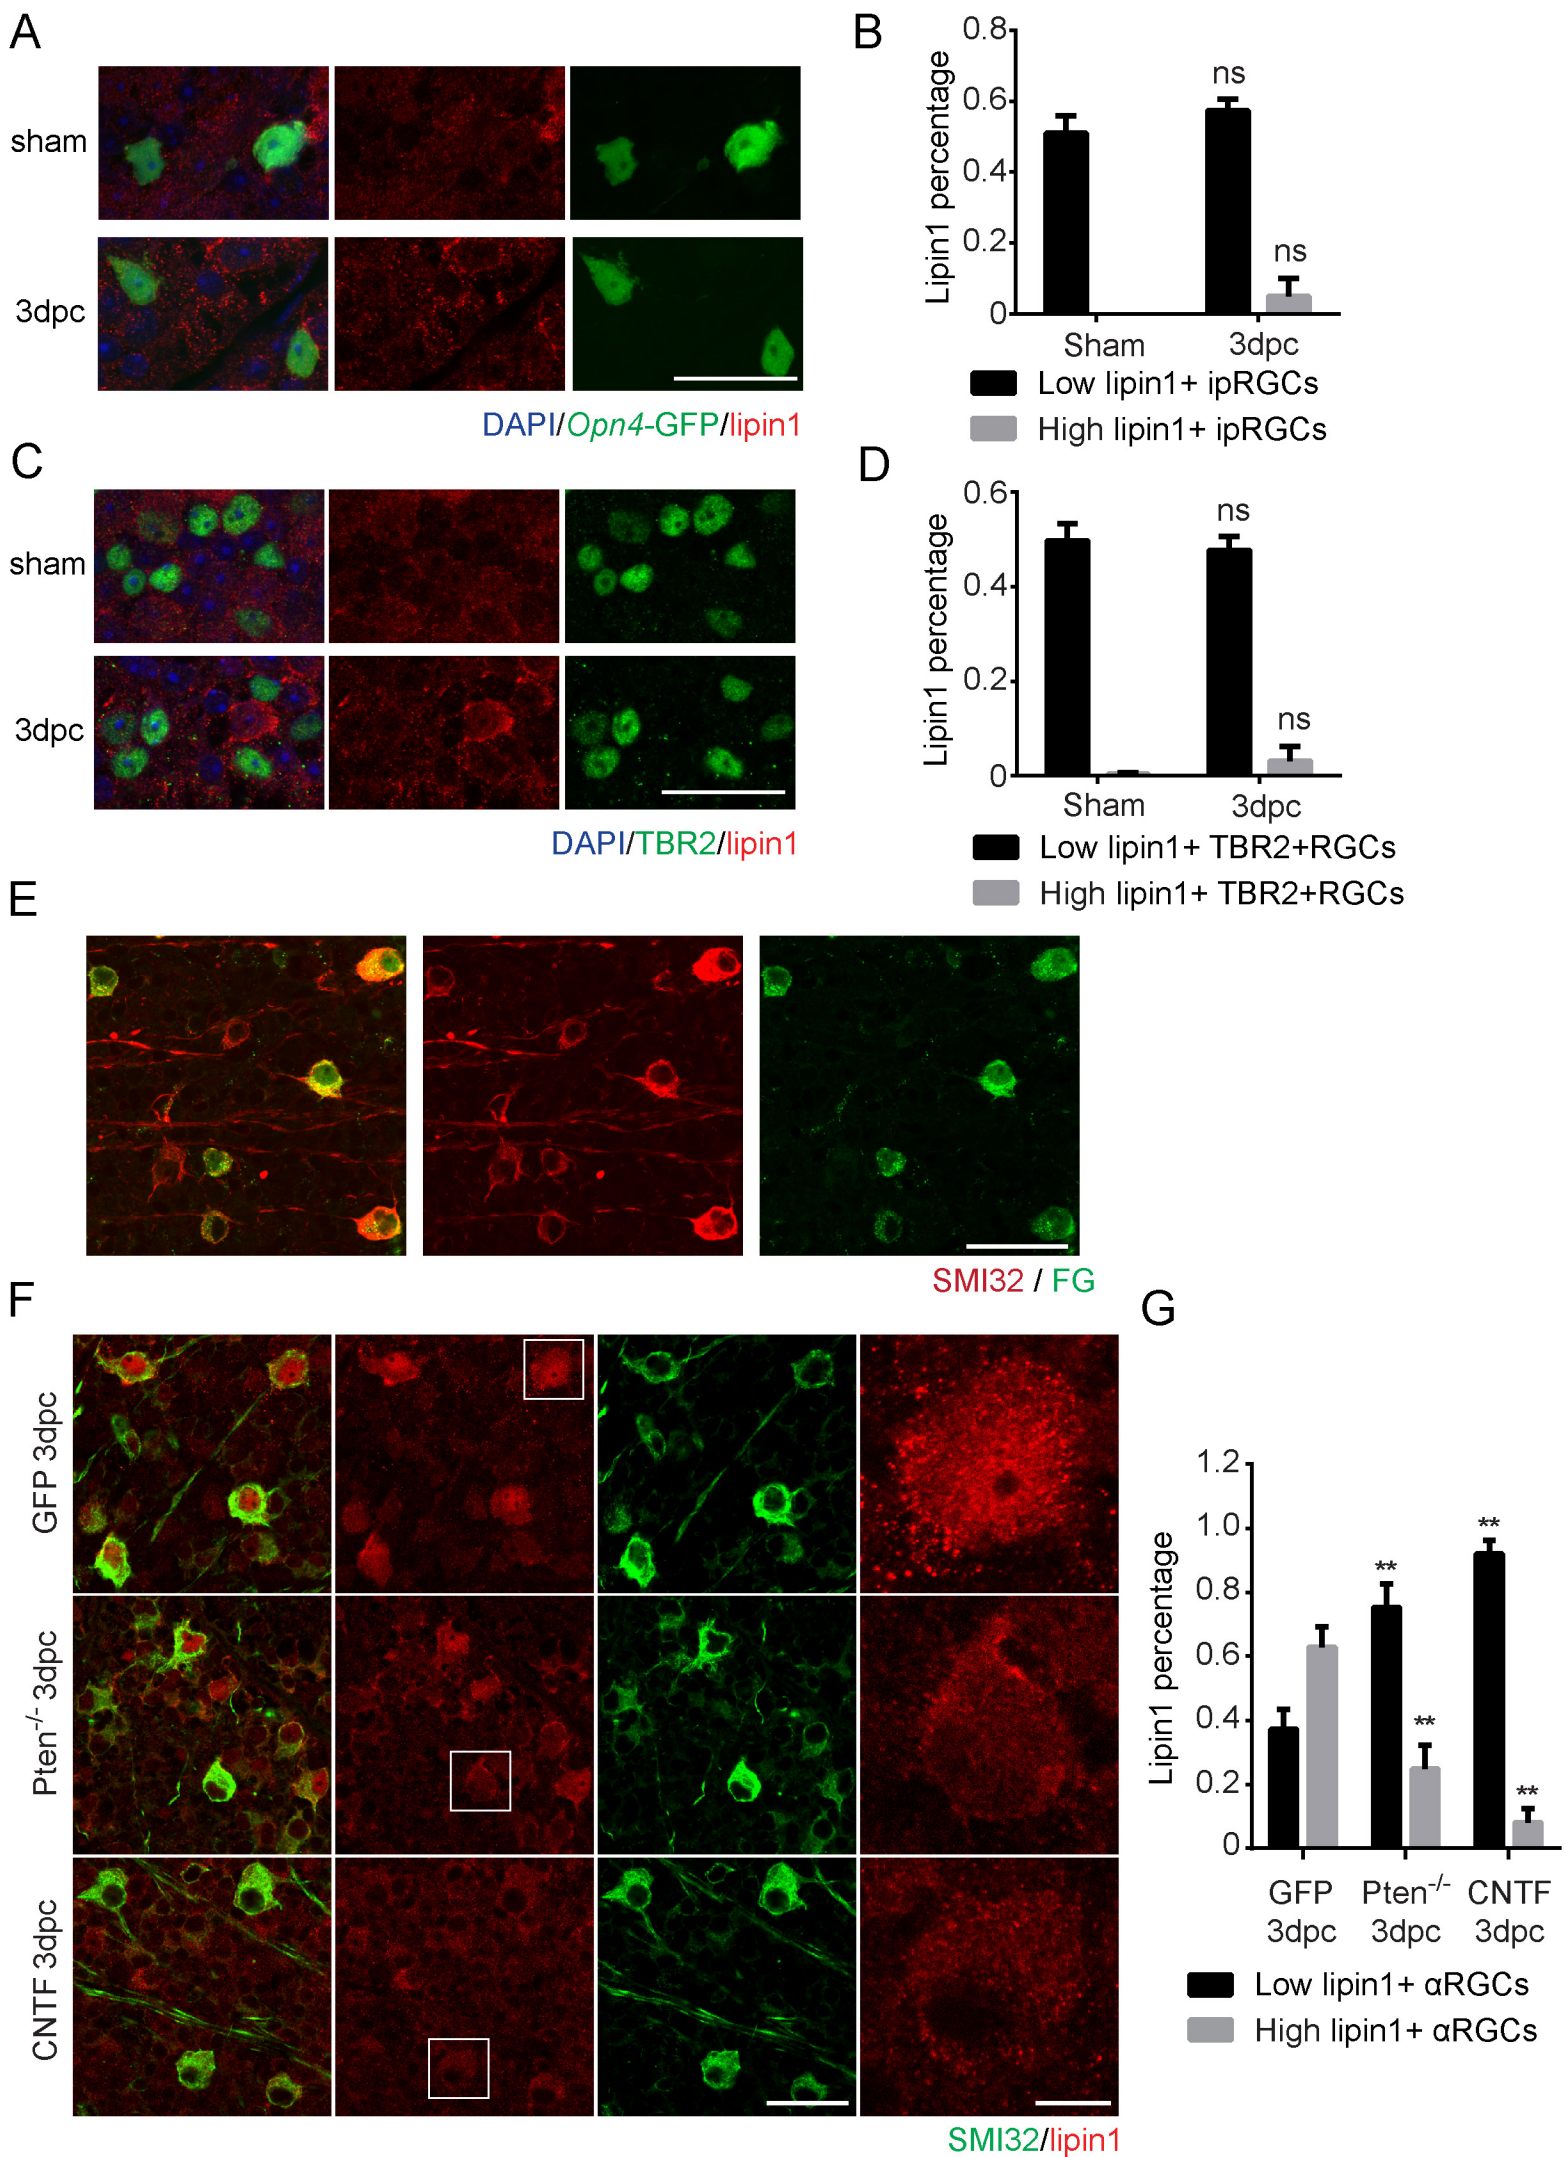

Figure S2

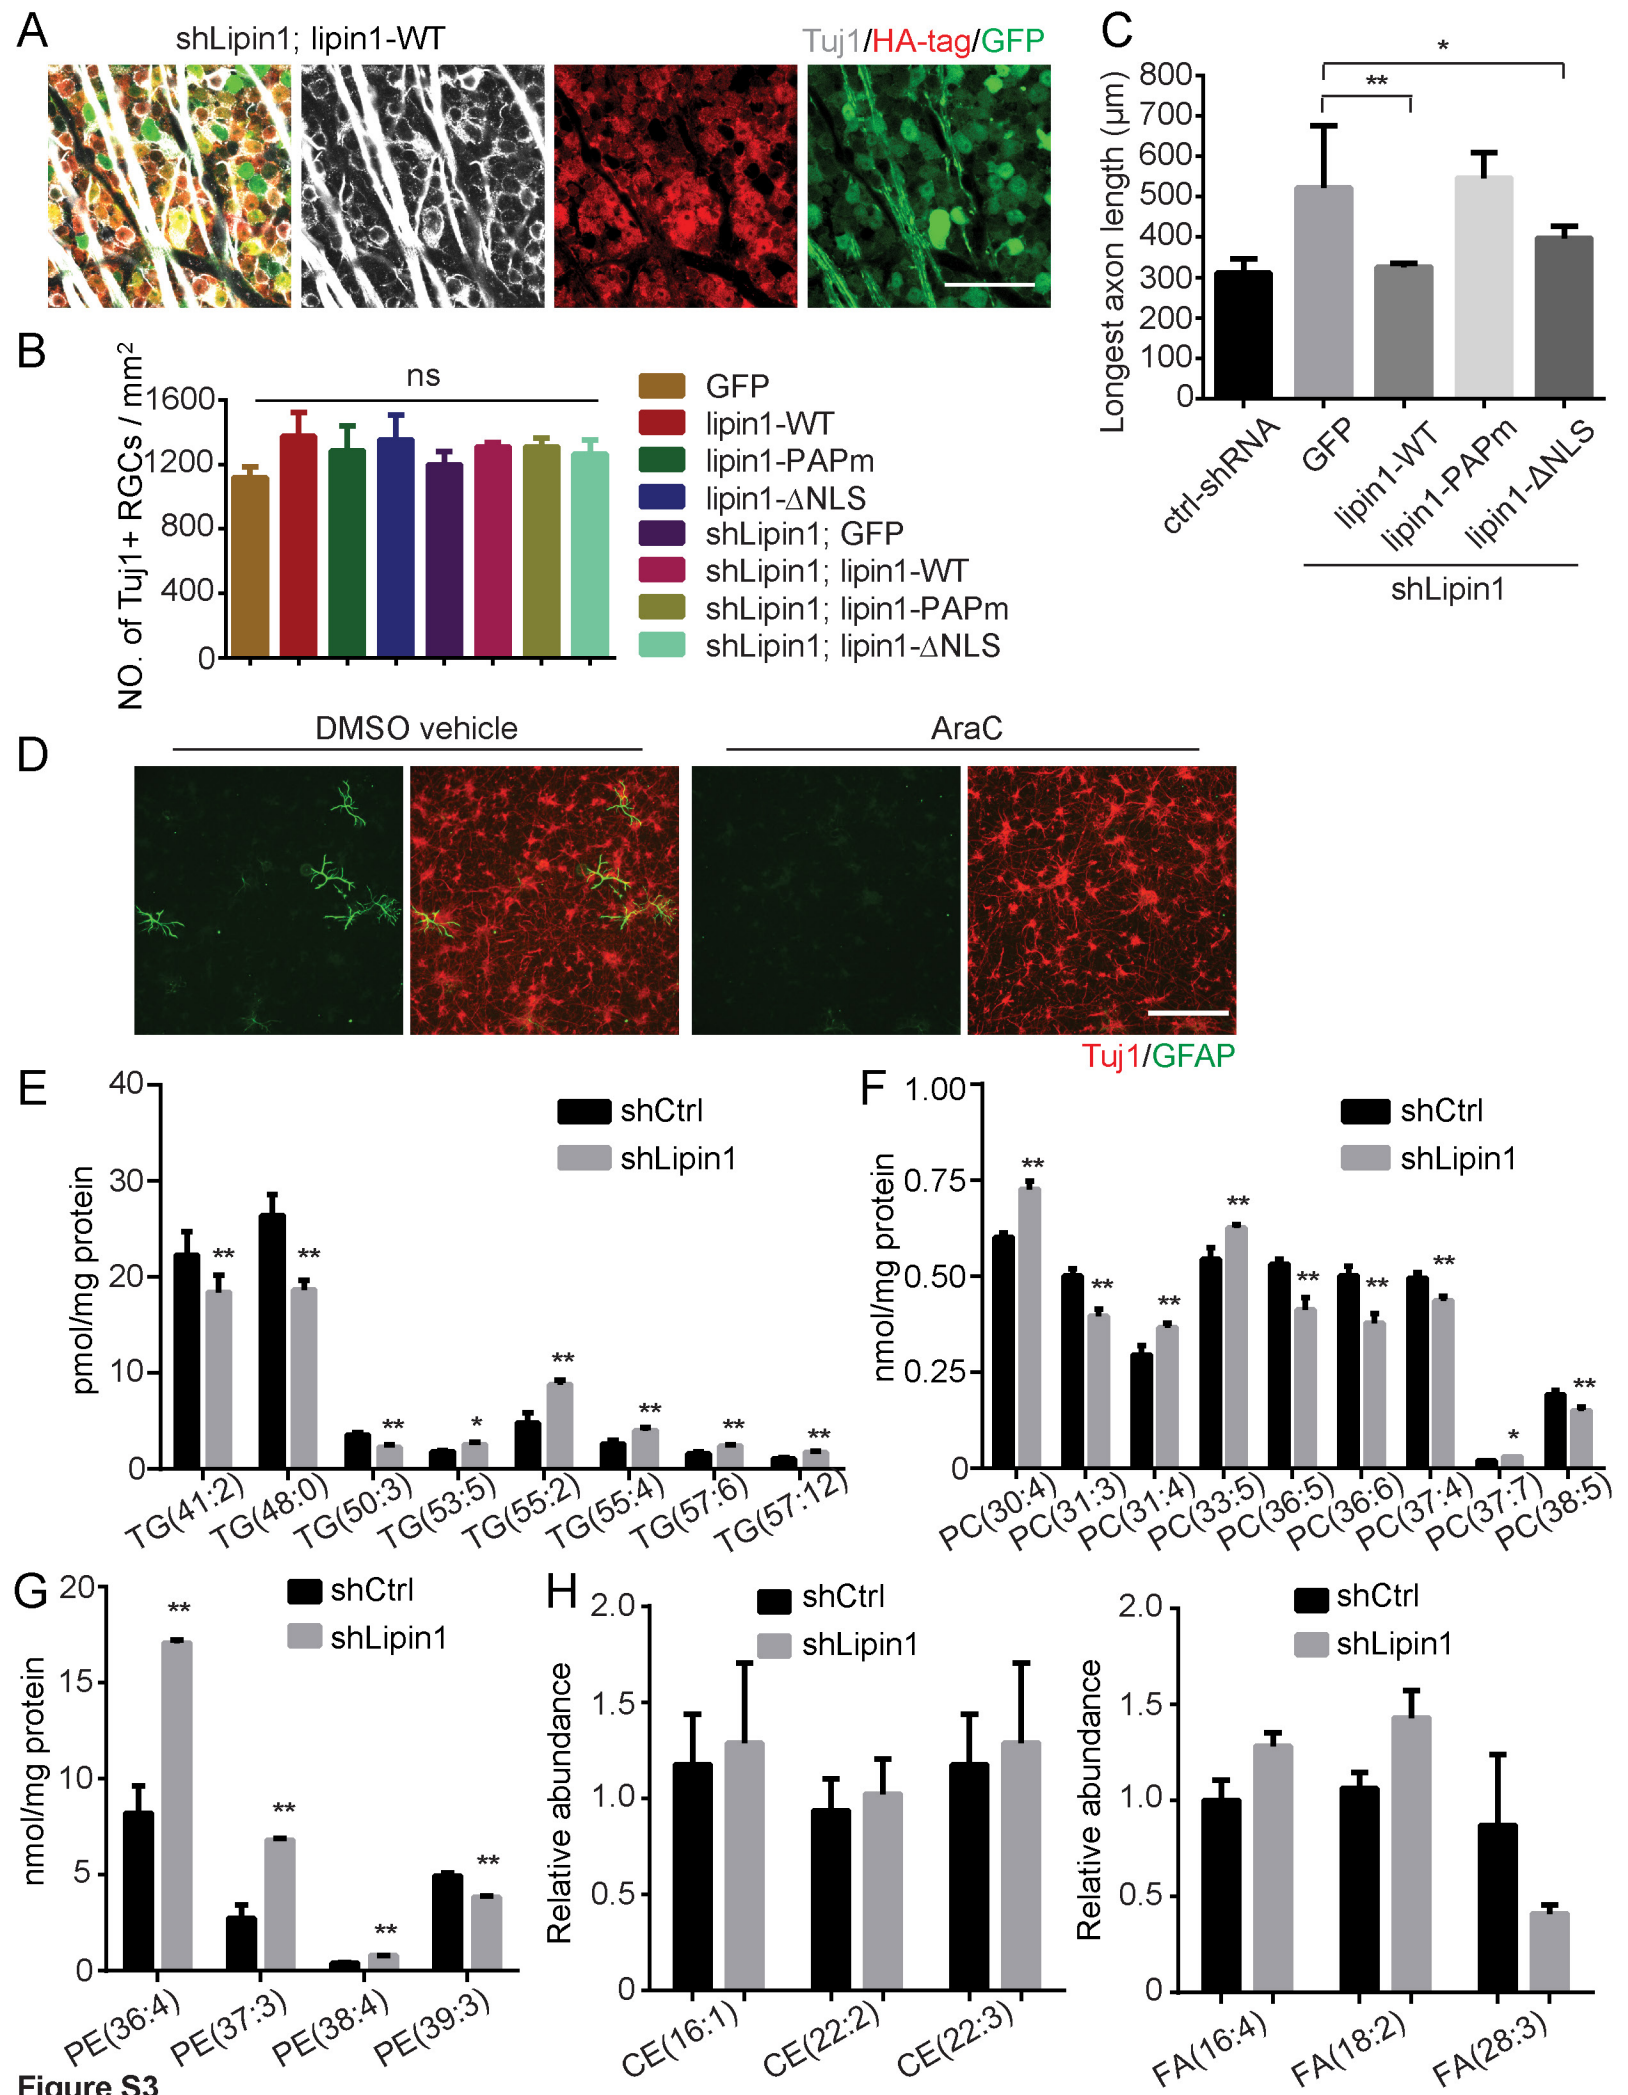

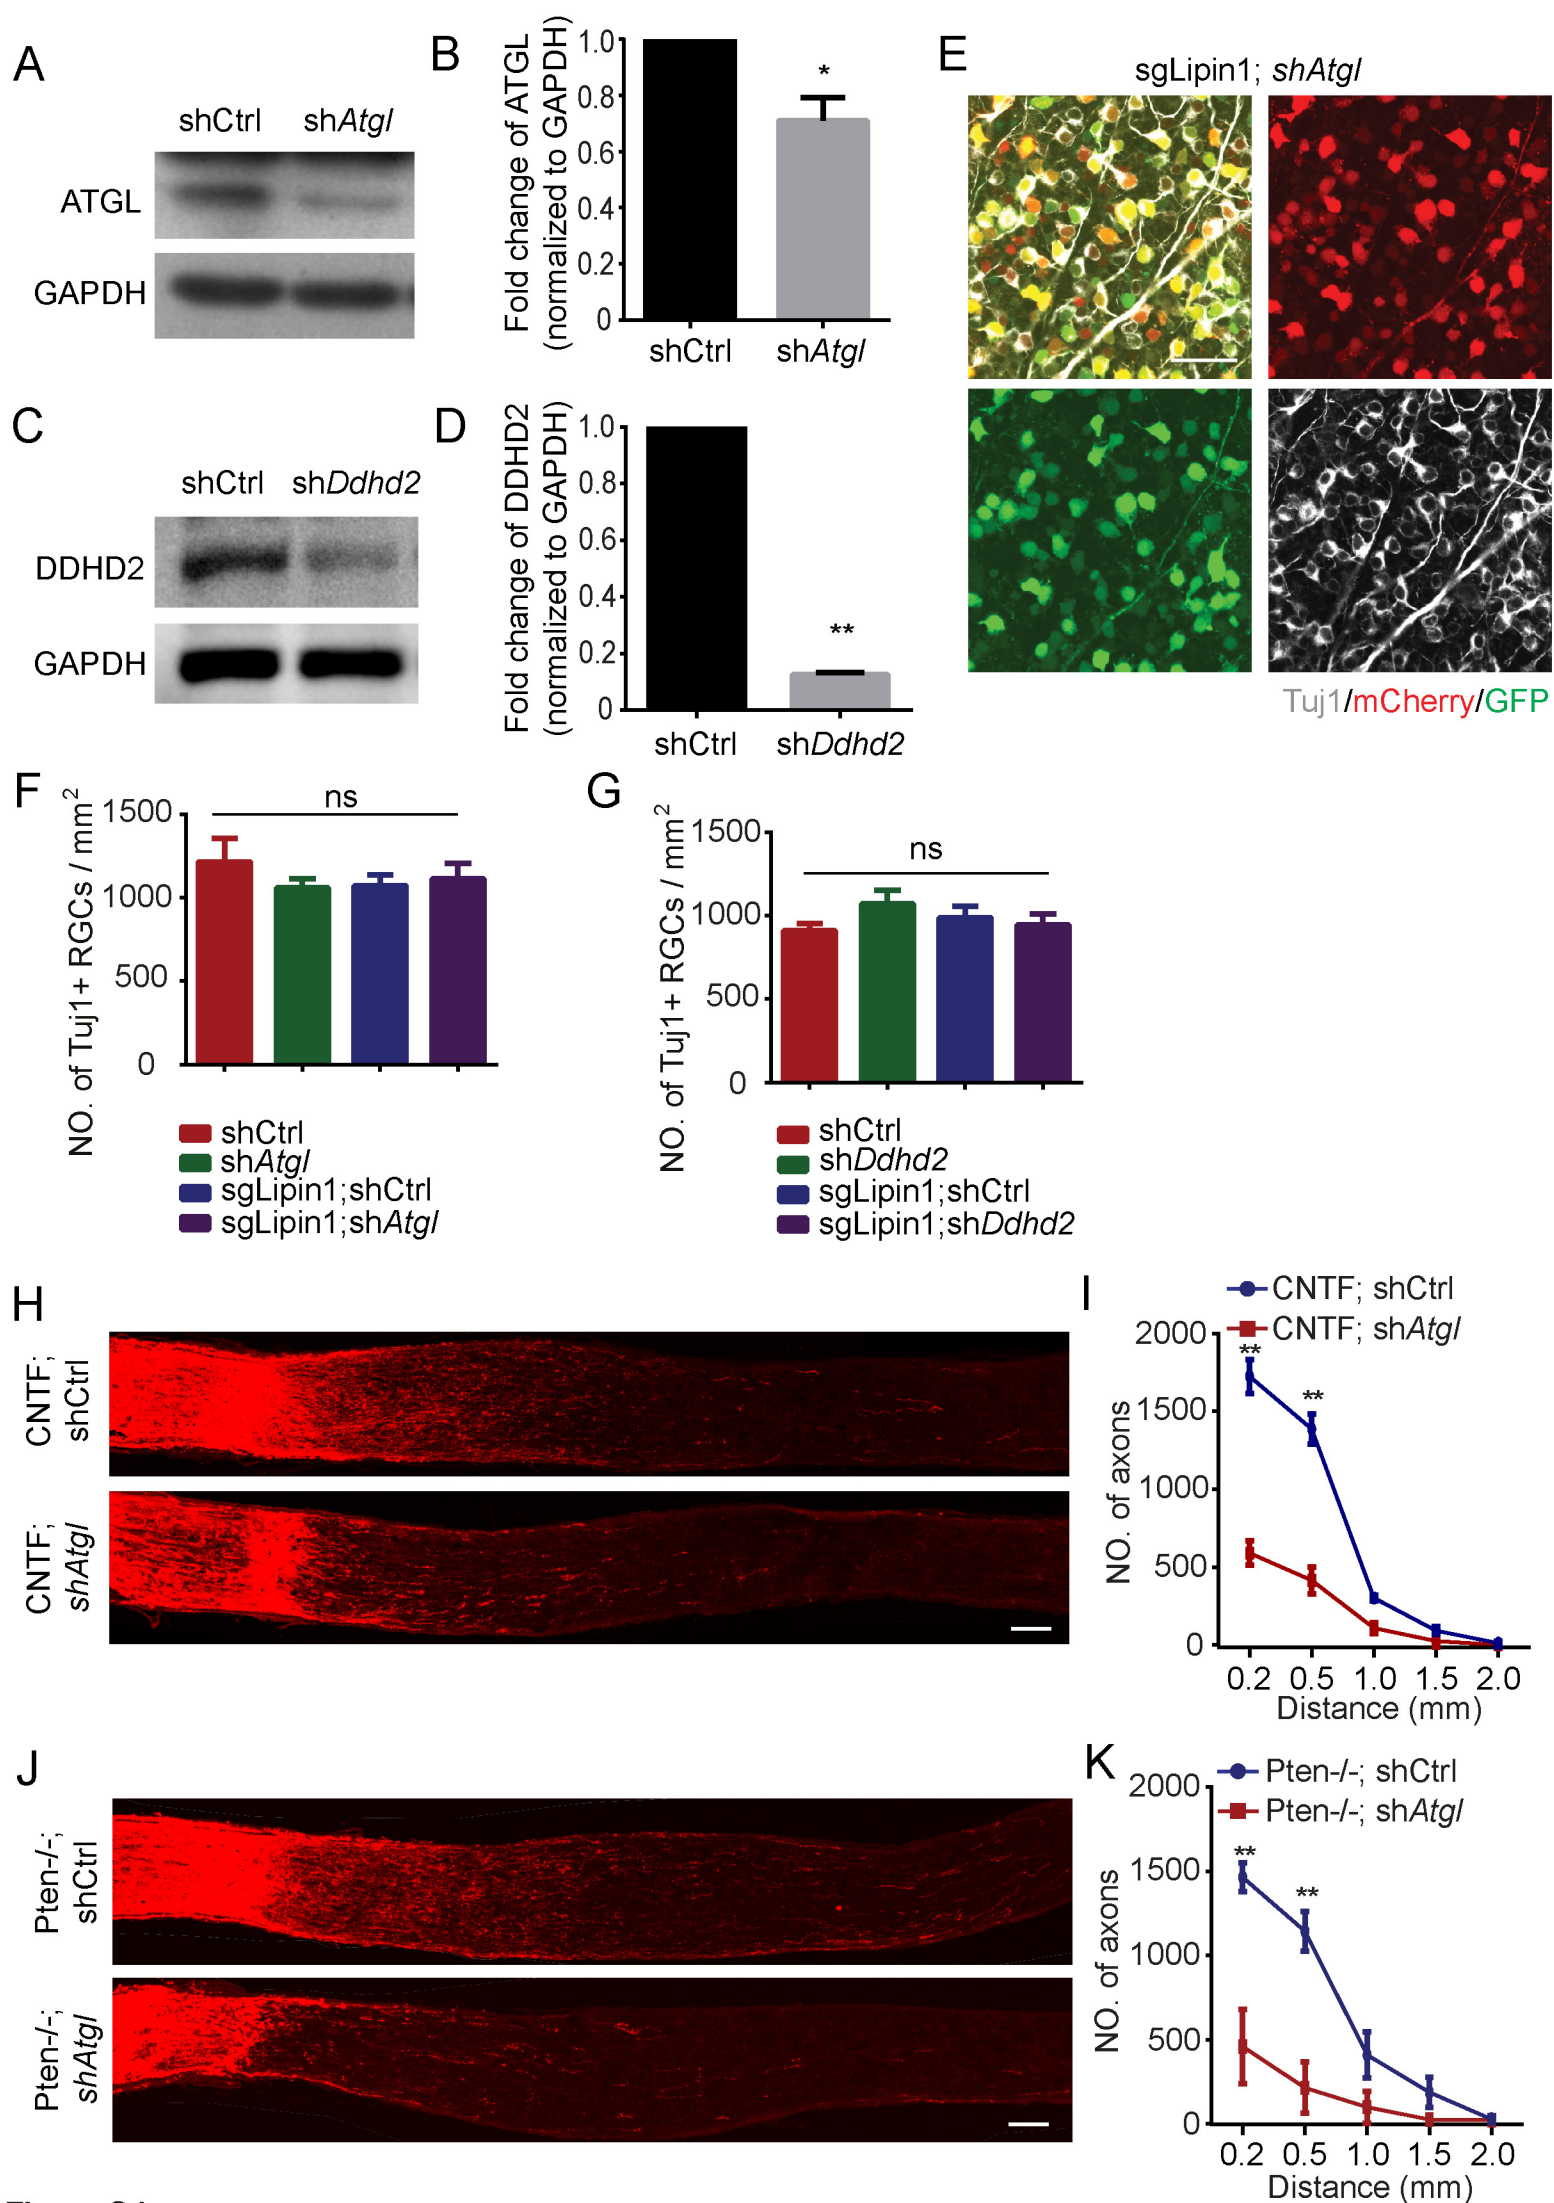

Figure S4

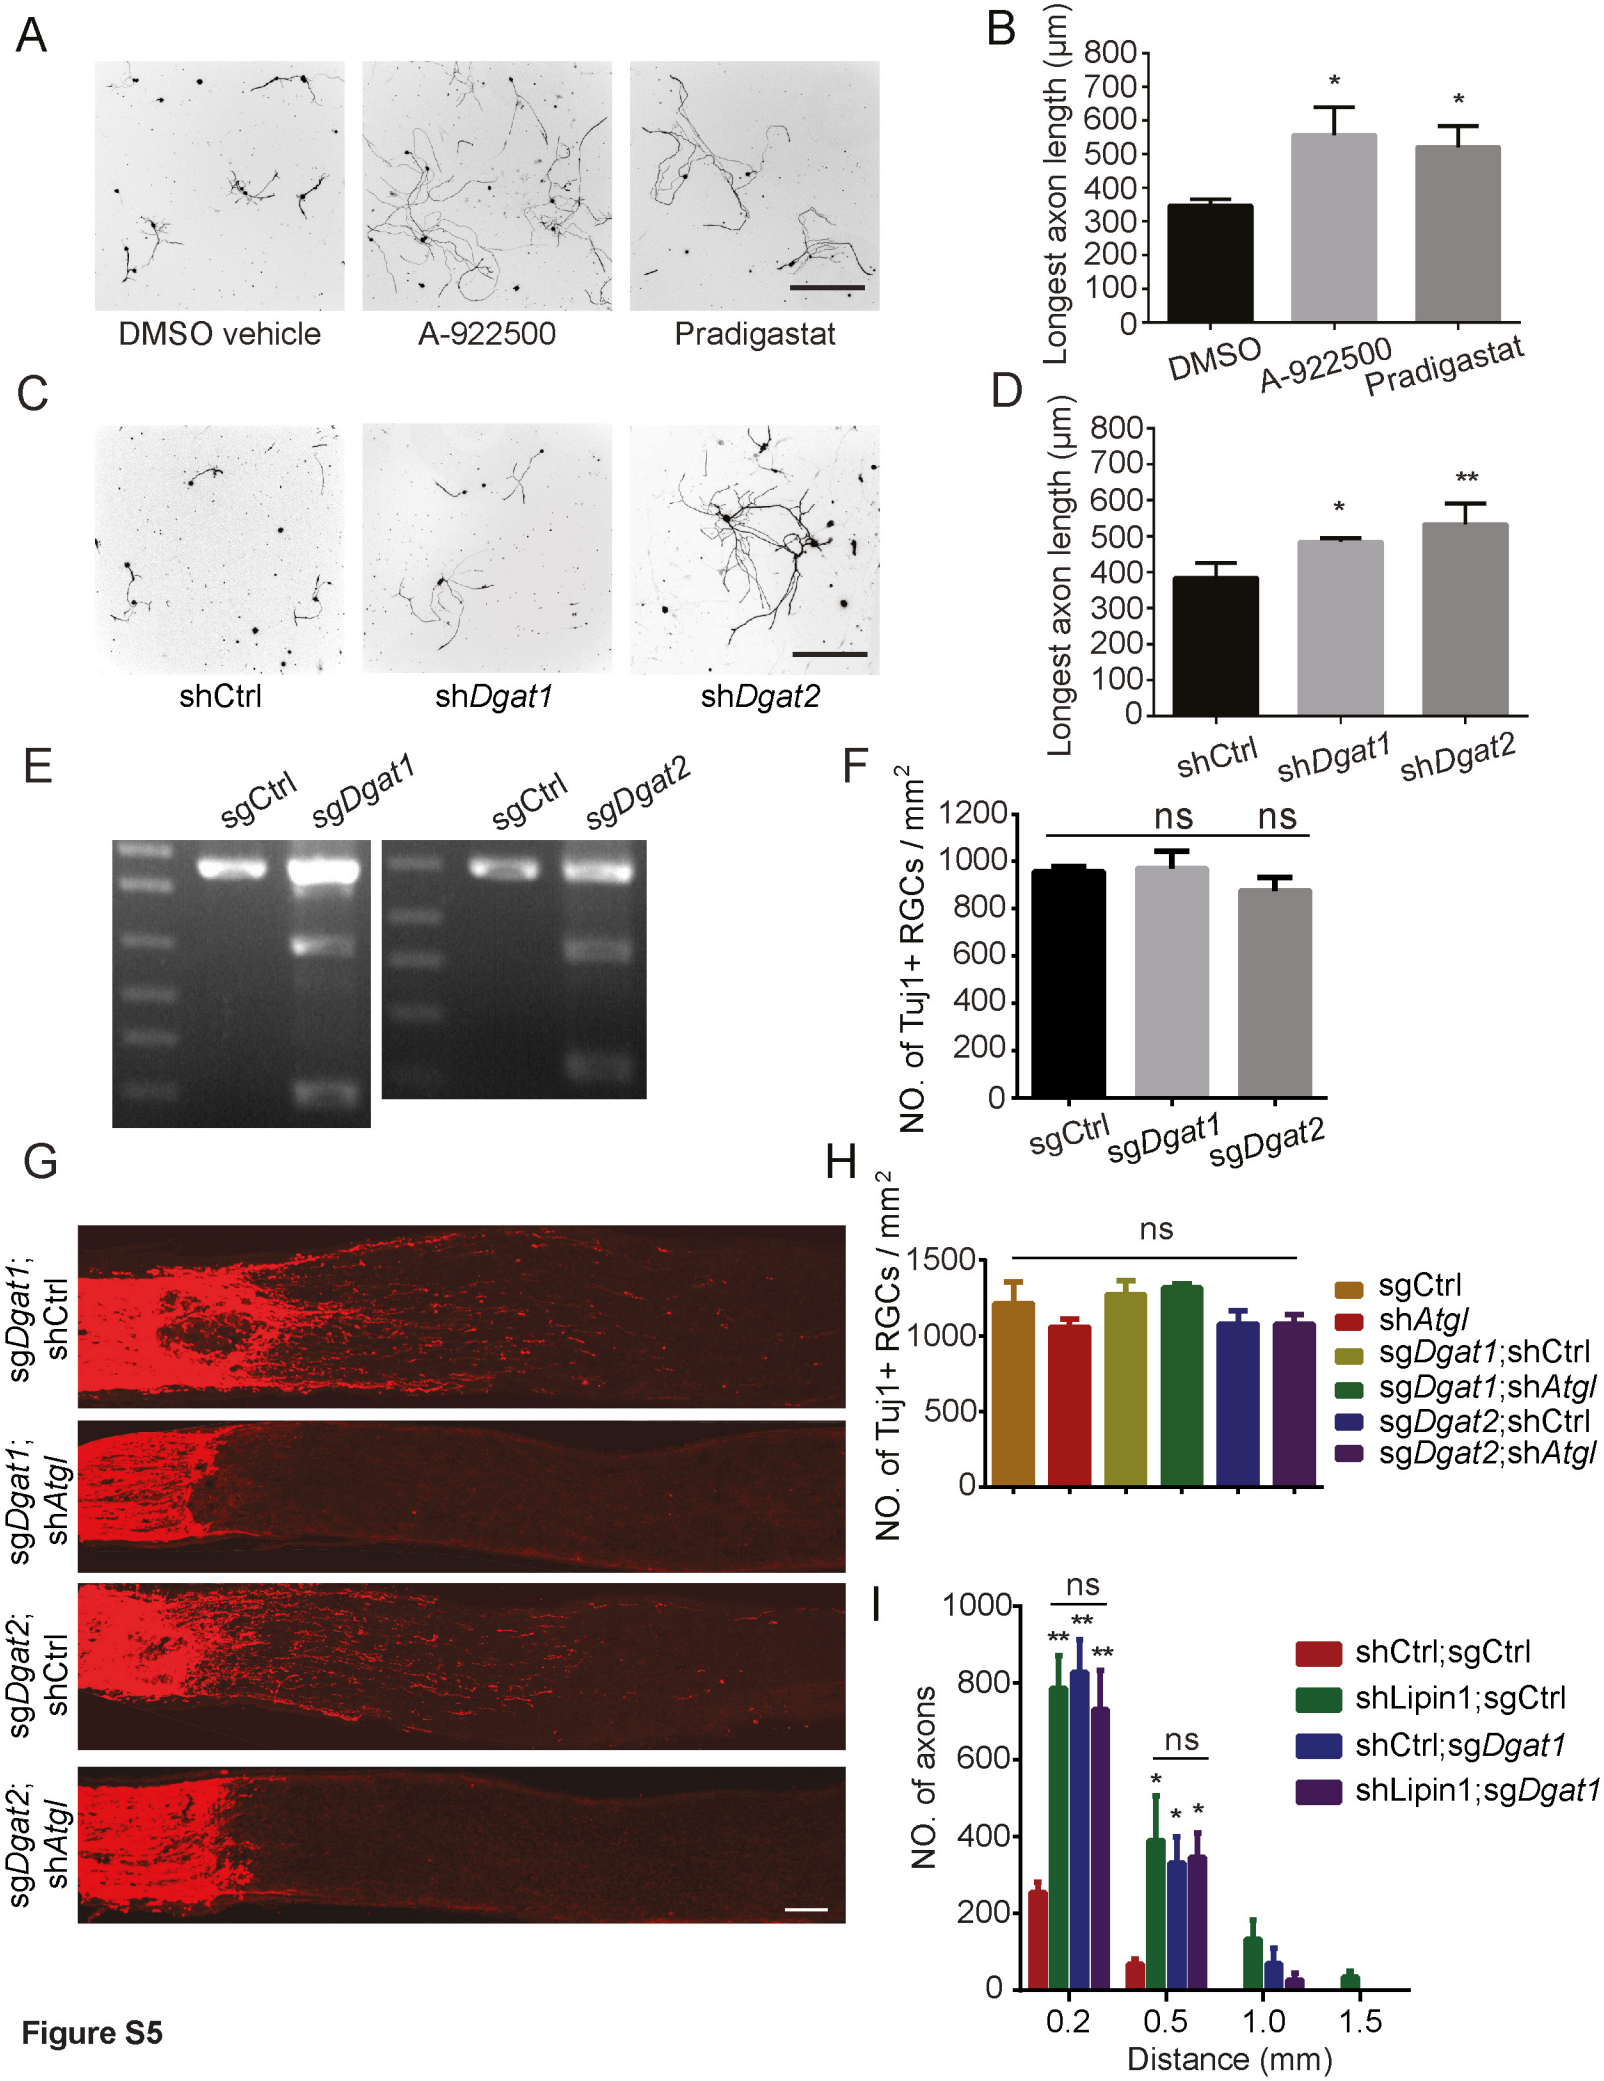

Figure S5

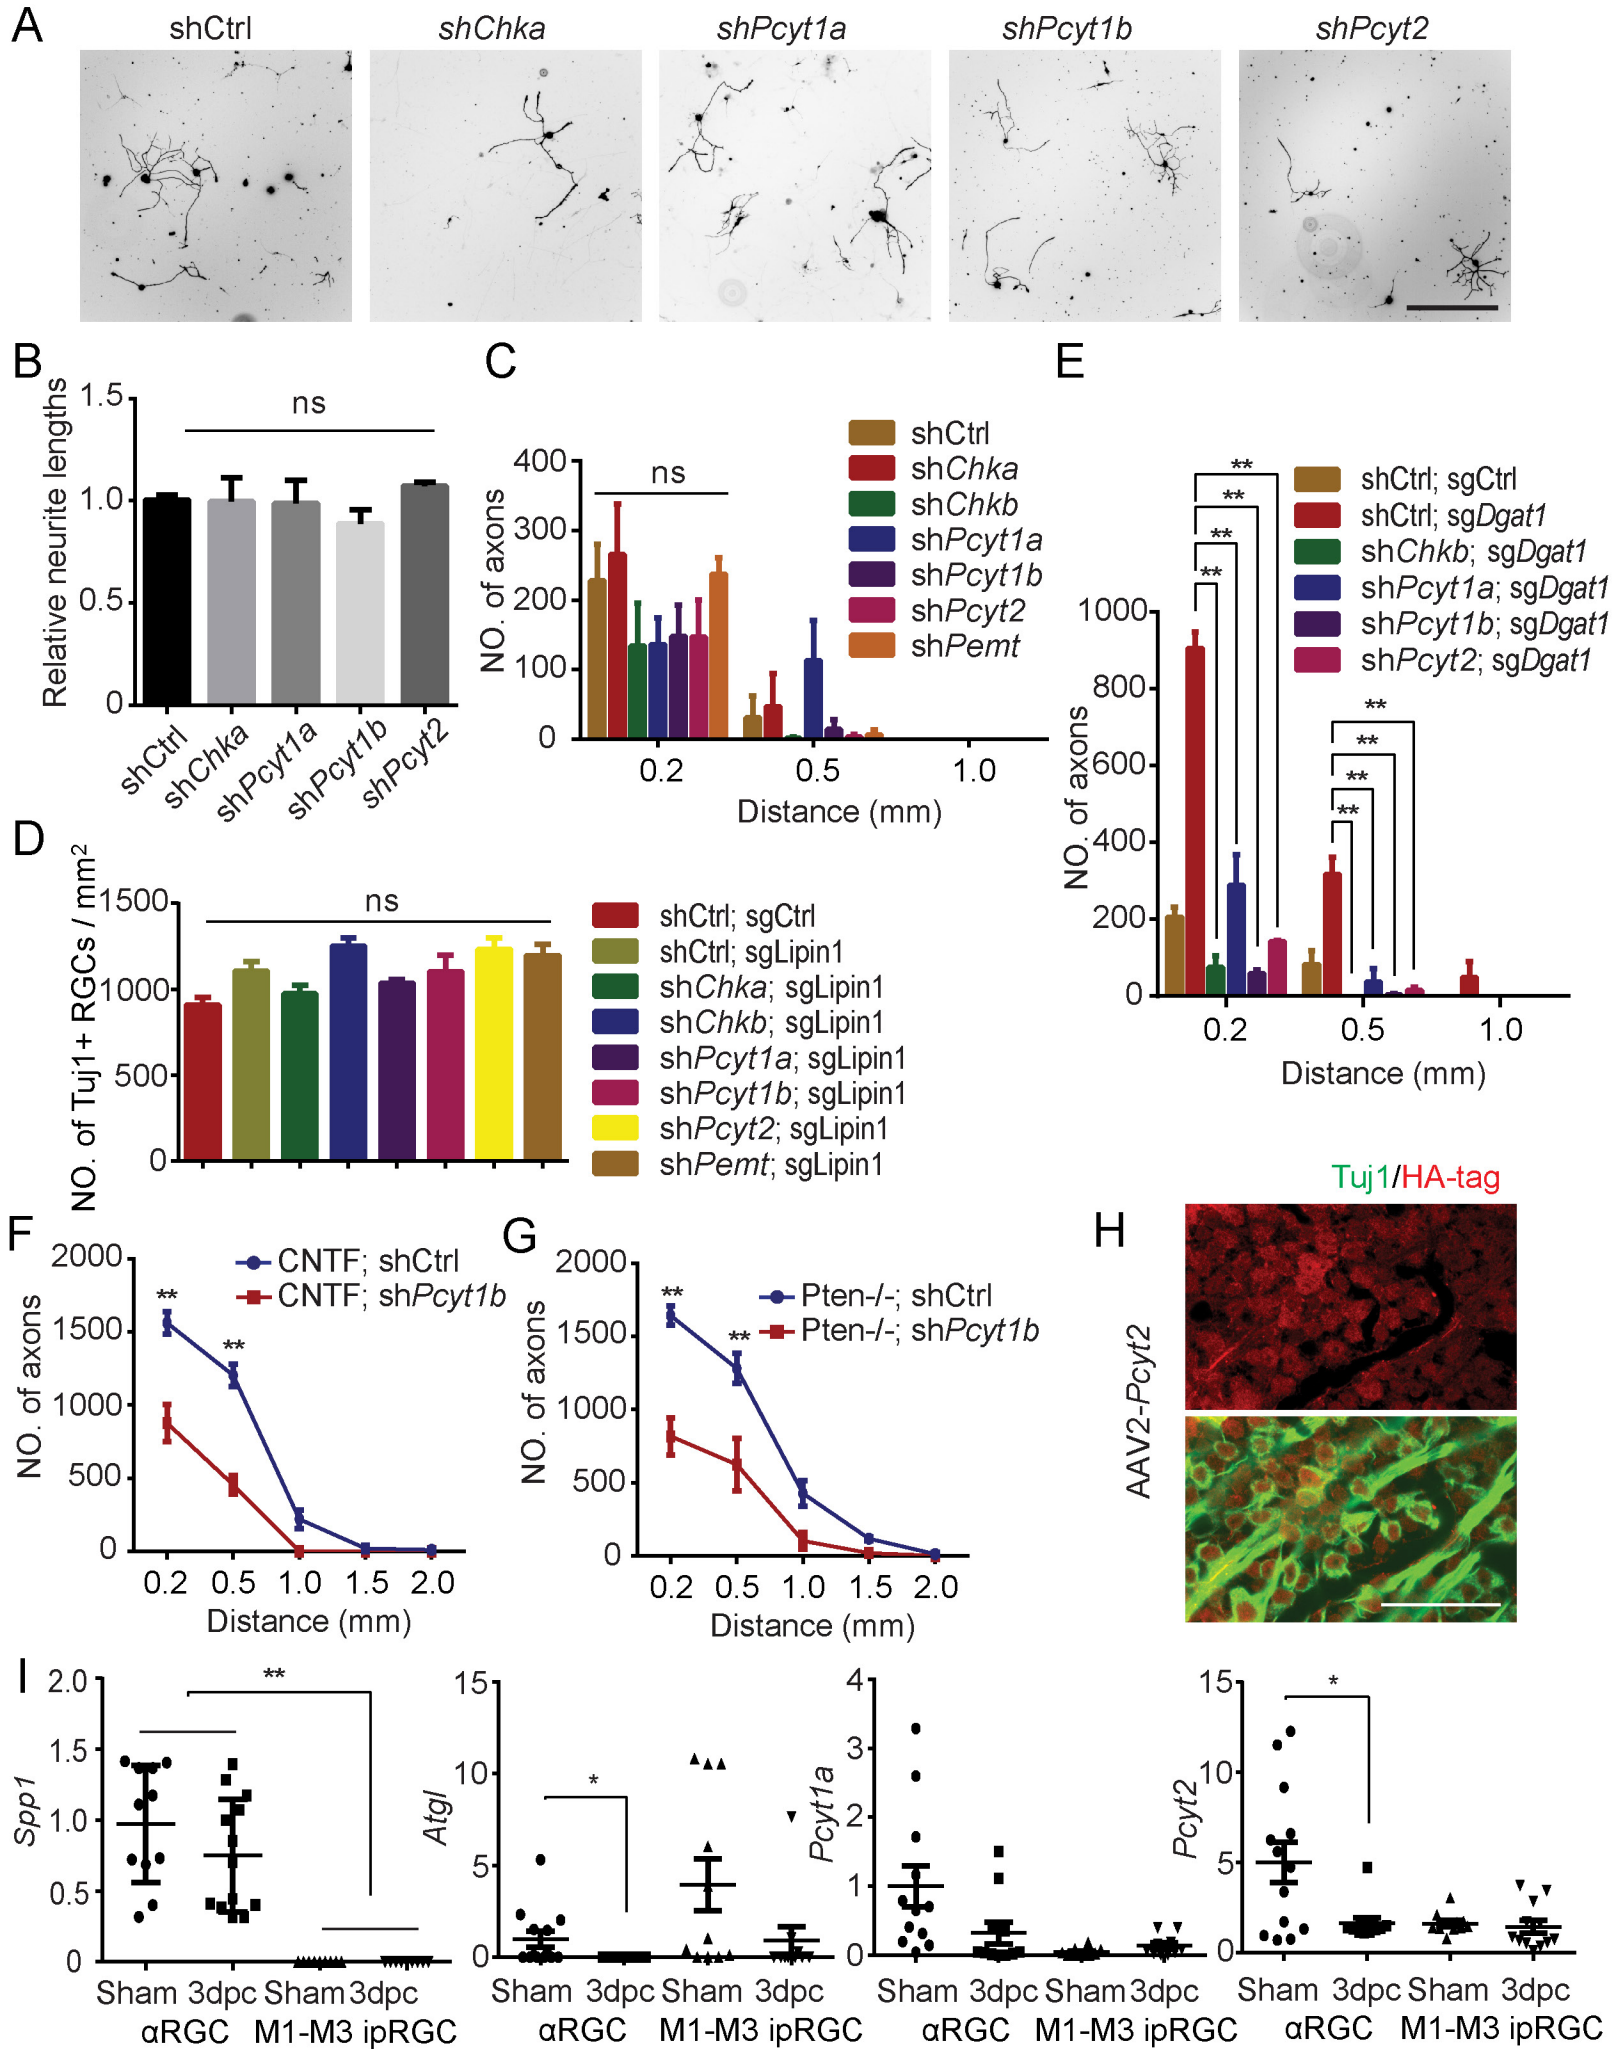

**Figure S6**

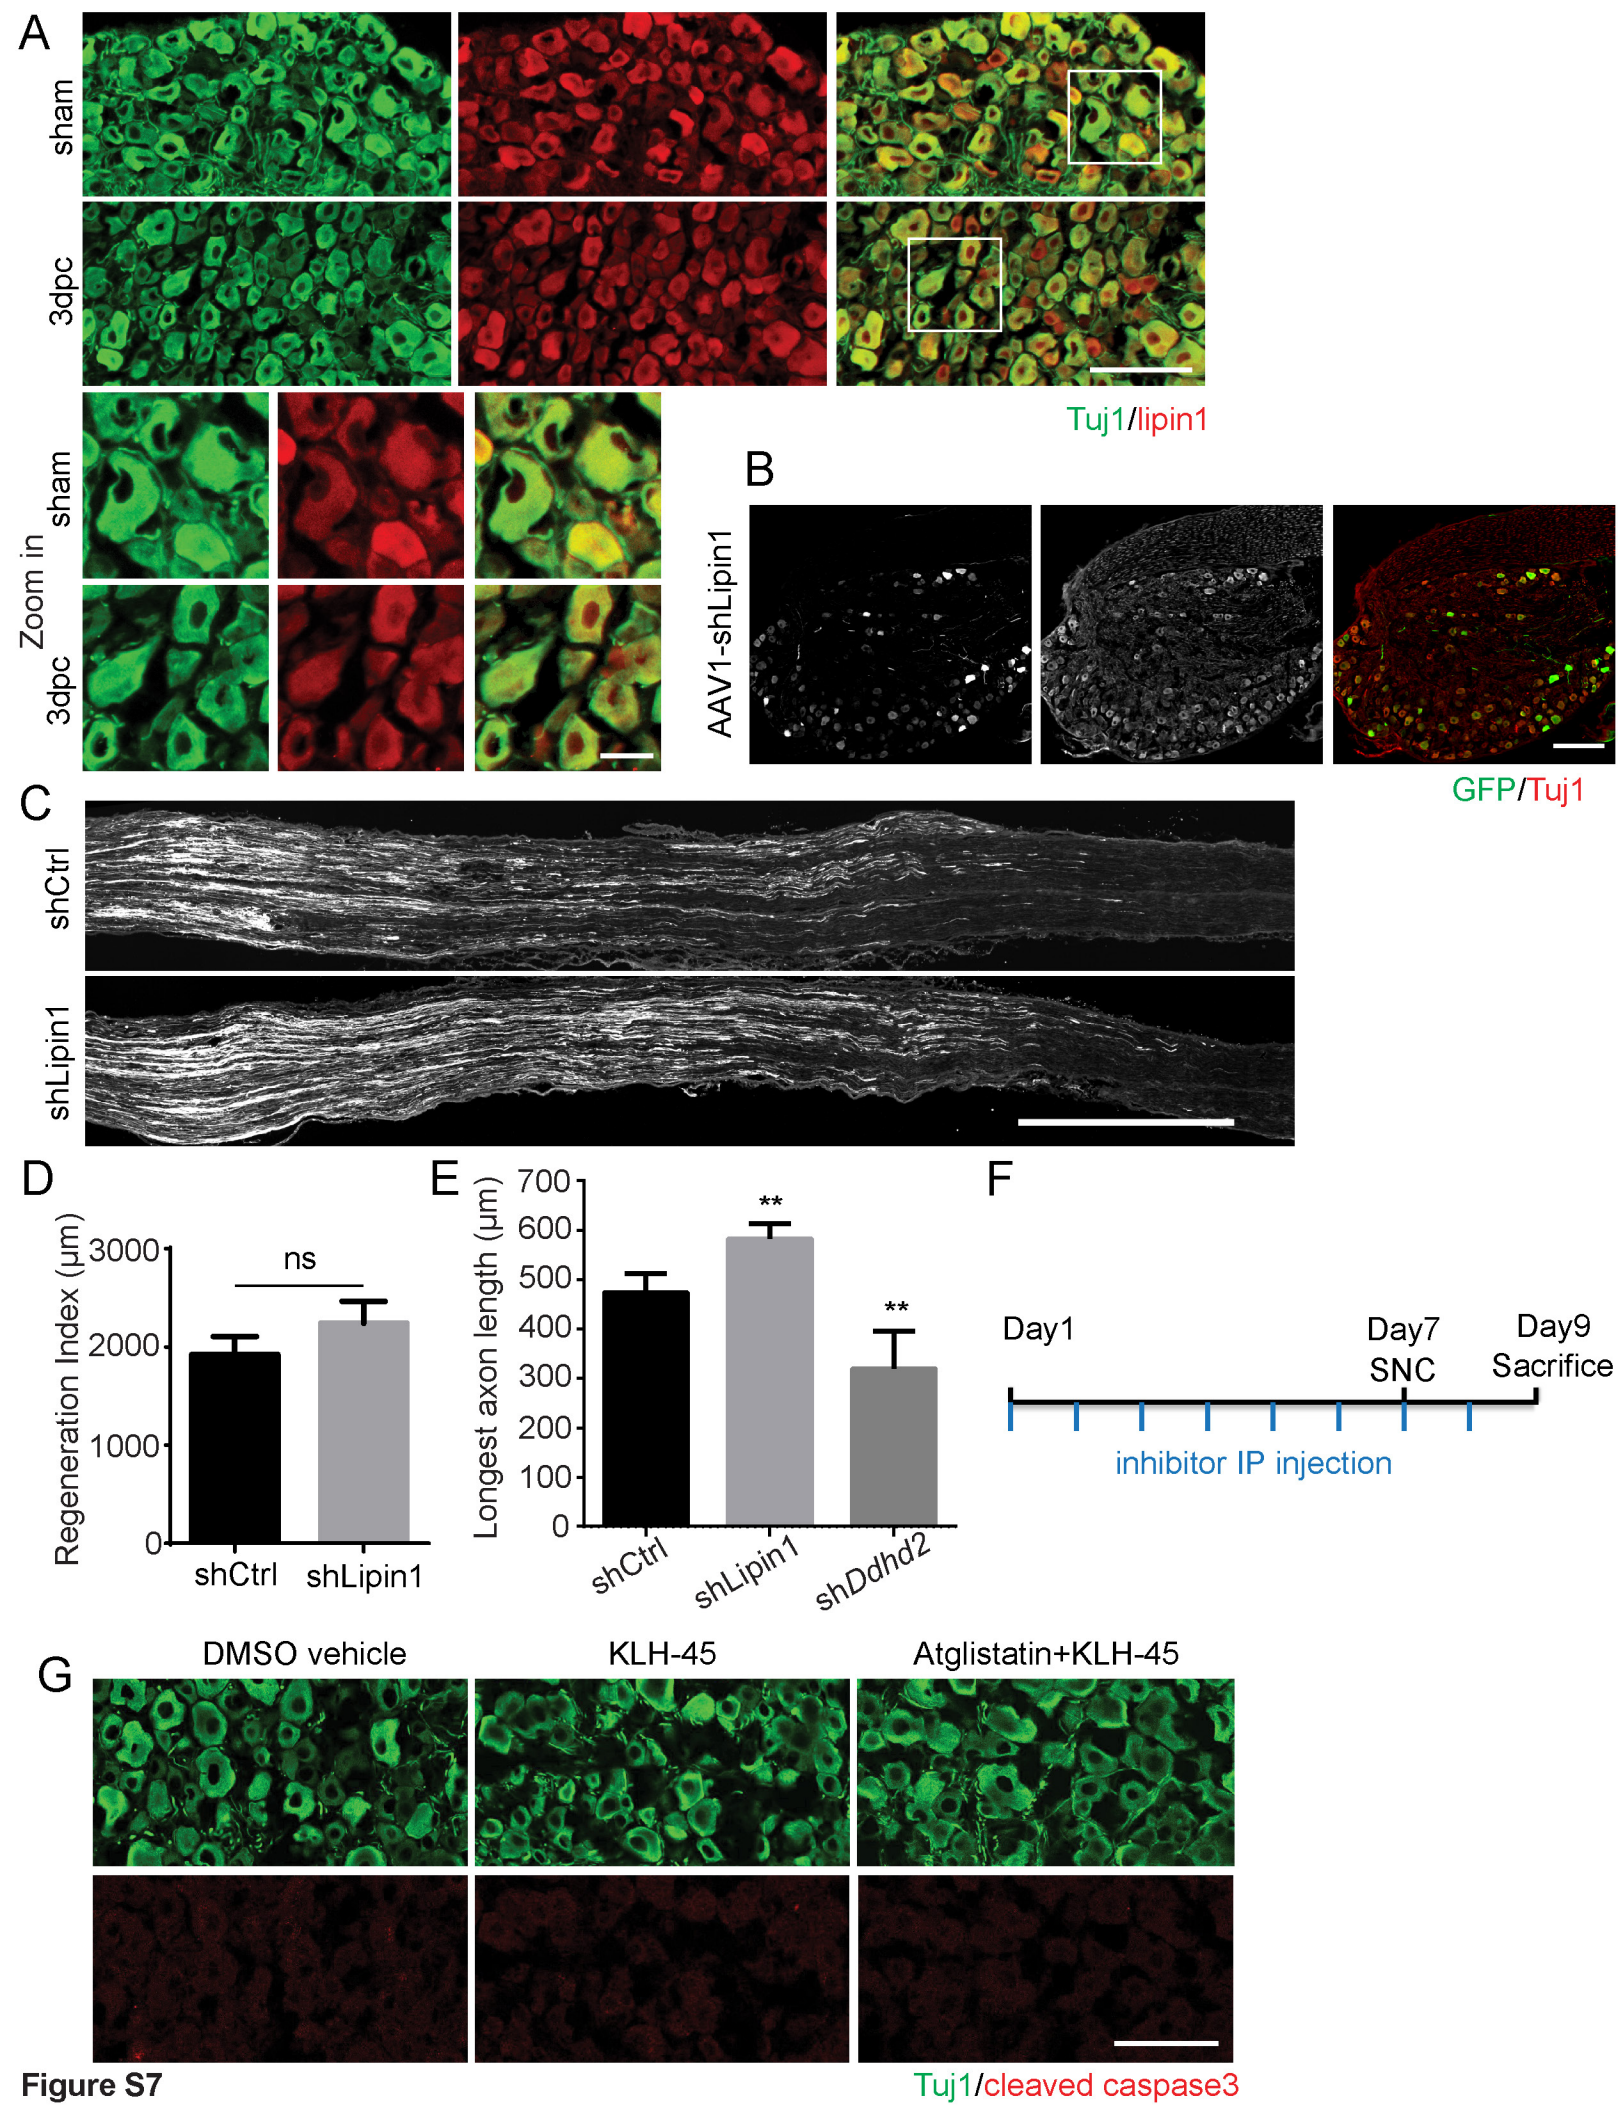

Figure S7

| <b>Gene</b>          | <b>Knockdown efficiency</b> |
|----------------------|-----------------------------|
| <i>Lpin1</i> -shRNA  | 72.8±13.0%                  |
| <i>Dgat1</i> -shRNA  | 93.7±2.3%                   |
| <i>Dgat2</i> -shRNA  | 97.8±1.3%                   |
| <i>Atgl</i> -shRNA   | 96.4±3.2%                   |
| <i>Ddhd2</i> -shRNA  | 99.2±0.5%                   |
| <i>Pcyt1a</i> -shRNA | 99.2±0.4%                   |
| <i>Pcyt1b</i> -shRNA | 60.3±25.5%                  |
| <i>Pcyt2</i> -shRNA  | 85.2±2.6%                   |
| <i>Pemt</i> -shRNA   | 97.1±1.8%                   |
| <i>Chka</i> -shRNA   | 96.8±2.7%                   |
| <i>Chkb</i> -shRNA   | 75.6±6.3%                   |

**Table S1: Assessment of shRNA knockdown efficiency, Related to Figure 1, Figure 4, Figure 5 and Figure 6.**

Control shRNA and respective shRNAs were transfected to Neuro2A cells. Cells were harvested 72 hrs after transfection and RNA was extracted. Expression levels of corresponding genes were measured by qPCR. Percentages shown are the decrease of corresponding gene expression compared to control shRNA.



| <b>Gene</b>         | <b>Knockout efficiency</b> |
|---------------------|----------------------------|
| <i>Lpin1</i> -sgRNA | 77.9±12.1%                 |
| <i>Lpin2</i> -sgRNA | 82.3±8.9%                  |
| <i>Dgat1</i> -sgRNA | 88.5±1.8%                  |
| <i>Dgat2</i> -sgRNA | 46.5±11.8%                 |

**Table S2: Assessment of CRISPR knockout efficiency, Related to Figure 1 and Figure 5.**

AAV-sgCtrl or respective sgRNA were injected to Rosa26-Cas9 mice. 4 weeks after injection, retinas from AAV injected mice were harvested and dissociated by papain. Retinal mCherry-positive cells were isolated by FACS and RNA was extracted. We designed primers for qPCR according to our sgRNA sequence to amplify the unchanged wild type mRNA. Percentages shown were calculated from qPCR measurement of unchanged mRNA.

| <b>Virus</b>               | <b>Expression percentage</b> |
|----------------------------|------------------------------|
| AAV2-Lipin1-shRNA          | 91.2±1.9 % GFP +             |
| AAV2-Lipin1-sgRNA          | 95.5±1.5 % mCherry +         |
| AAV2-Lipin2-sgRNA          | 91.6±1.6 % mCherry +         |
| Lipin1-shRNA; Lipin2-sgRNA | 86.2±3.6 % mCherry+ GFP+     |
| AAV2-Lipin1-WT             | 97.7±1.2 % HA-tag +          |
| AAV2-Lipin1-PAPm           | 97.3±1.3 % HA-tag +          |
| AAV2-Lipin1-ΔNLS           | 95.2±2.3 % HA-tag +          |
| Lipin1-shRNA; Lipin1-WT    | 83.9±1.9 % HA-tag + GFP+     |
| Lipin1-shRNA; Lipin1-PAPm  | 84.1±1.1 % HA-tag + GFP+     |
| Lipin1-shRNA; Lipin1-ΔNLS  | 81.9±2.3 % HA-tag + GFP+     |
| AAV2-Atgl-shRNA            | 95.5±0.9 % GFP +             |
| Atgl-shRNA; Lipin1-sgRNA   | 89.7±0.7 % mCherry+ GFP+     |
| AAV2-Ddhd2-shRNA           | 93.1±0.4 % GFP +             |
| Ddhd2-shRNA; Lipin1-sgRNA  | 86.7±2.7 % mCherry+ GFP+     |
| AAV2-Dgat1-sgRNA           | 94.1±2.3 % mCherry +         |
| Atgl-shRNA; Dgat1-sgRNA    | 83.6±3.9 % mCherry+ GFP+     |
| AAV2-Dgat2-sgRNA           | 93.1±2.6 % mCherry +         |
| Atgl-shRNA; Dgat2-sgRNA    | 84.2±0.3 % mCherry+ GFP+     |
| Lipin1-shRNA; Dgat1-sgRNA  | 85.4±2.3 % mCherry+ GFP+     |
| AAV2-Chka-shRNA            | 91.1±1.1 % GFP +             |
| AAV2-Chkb-shRNA            | 93.1±0.3 % GFP +             |
| AAV2-Pcyt1a-shRNA          | 92.1±1.2 % GFP +             |
| AAV2-Pcyt1b-shRNA          | 88.9±0.9 % GFP +             |
| AAV2-Pcyt2-shRNA           | 89.7±1.2 % GFP +             |
| AAV2-Pemt-shRNA            | 90.9±2.5 % GFP +             |
| Chka-shRNA; Lipin1-sgRNA   | 86.4±3.2 % mCherry+ GFP+     |
| Chkb-shRNA; Lipin1-sgRNA   | 85.3±1.8 % mCherry+ GFP+     |
| Pcyt1a-shRNA; Lipin1-sgRNA | 84.8±2.2 % mCherry+ GFP      |
| Pcyt1b-shRNA; Lipin1-sgRNA | 84.7±1.6 % mCherry+ GFP+     |
| Pcyt2-shRNA; Lipin1-sgRNA  | 83.7±1.1 % mCherry+ GFP+     |
| Pemt-shRNA; Lipin1-sgRNA   | 82.8±3.2 % mCherry+ GFP+     |
| AAV2-Pcyt1a-WT             | 93.4±1.3 % HA-tag +          |
| AAV2-Pcyt1a-CA             | 91.3±2.2 % HA-tag +          |
| AAV2-Pcyt1b                | 94.8±1.0 % HA-tag +          |
| AAV2-Pcyt2                 | 92.5±2.5 % HA-tag +          |

**Table S3. Assessment of virus expression efficiency for in vivo experiment, Related to Figure 1, Figure 3, Figure 4, Figure 5 and Figure 6.** Respective viruses were injected to wildtype mice. 4 weeks after injection, retinas were harvested and then immunostained by HA-tag and Tuj1 antibody. Percentages shown were calculated by the ratio of GFP, mCherry or HA-tag positive cells to Tuj1 positive cells.

| <b>Sequence for shRNA</b> |                         |
|---------------------------|-------------------------|
| Control shRNA             | GACCATCAATATGACTAGA     |
| Lipin1 shRNA:             | CGGAACTCTGTAGACAGAAT    |
| <i>Dgat1</i> shRNA        | GCCCTTCAAGGATATGGACT    |
| <i>Dgat2</i> shRNA:       | GCTACTTCCGAGACTACTTT    |
| <i>Atgl</i> shRNA         | GTGAAGCAGGTGCCAACATTA   |
| <i>Ddhd2</i> shRNA        | GAAAGAAGATACTGAACCA     |
| <i>Chka</i> shRNA         | GAGGCCGACTGGAGCAGTTTAT  |
| <i>Chkb</i> shRNA         | GTGAGTGGGTTTATGATTATA   |
| <i>Pemt</i> shRNA         | GTTGACGGTGCTGGTGGCAA    |
| <i>Pcyt1a</i> shRNA       | GTCACTGTGATGAACGAGAATG  |
| <i>Pcyt1b</i> shRNA       | GCCAGGTACAAACAGACACTTA  |
| <i>Pcyt2</i> shRNA        | CTGCTATGACATGGTGCATTA   |
| <b>Sequence for sgRNA</b> |                         |
| Control Lacz sgRNA        | GCGTCGTGACTGGGAAAACCC   |
| Lipin1 sgRNA1             | GGTTCAGACAATGAATTACG    |
| Lipin1 sgRNA2             | GTTCAGACAATGAATTACGT    |
| Lipin2 sgRNA1             | GGTTATATATCCGGATCACGAGG |
| Lipin2 sgRNA2             | GTACGTGAAAAGGCGAGCACTGG |
| <i>Dgat1</i> sgRNA1       | CTCAACTACGATGCCCCAG     |
| <i>Dgat1</i> sgRNA2       | GATCTTGCAGACGATGGCACC   |
| <i>Dgat2</i> sgRNA1       | GATTTGGCCTTCCAGAGACTG   |
| <i>Dgat2</i> sgRNA2       | GCCCGGAGTAGGCGGCGATGA   |

**Table S4. Sequence information of shRNA and sgRNA, Related to Figure 1, Figure 4, Figure 5 and Figure 6.**

**Sequence for qPCR primers**

|                           |                                                                            |
|---------------------------|----------------------------------------------------------------------------|
| Lipin1 qPCR primer        | Foward:<br>ATGAATTACGTGGGGCAGC<br><br>Reverse:<br>CCACTTTCTCTCGGGAGCGG     |
| Lipin2 qPCR primer        | Foward:<br>AACCGTTACTACAACCTGGGC<br><br>Reverse:<br>CGCCAAAACCACCATCGACC   |
| <i>Dgat1</i> qPCR primer  | Foward:<br>GGTGCCATCGTCTGCAAGAT<br><br>Reverse:<br>ACCAGGATGCCATACTTGAT    |
| <i>Dgat2</i> qPCR primer  | Foward:<br>ACCCACCCCTTCTAGCGTTC<br><br>Reverse:<br>TCTCAAGAATCCCTGGAGTCAC  |
| <i>Atgl</i> qPCR primer   | Foward:<br>GACAGCTCCACCAACATCCA<br><br>Reverse:<br>CCTTCGAGAGGCGGTAGAGA    |
| <i>Ddhd2</i> qPCR primer  | Foward:<br>GCCAGGAAGAATTCATTTGACCC<br><br>Reverse:<br>TGGTGTGGGATCAGCATTGG |
| <i>Pcyt1a</i> qPCR primer | Foward:<br>CCGTAAACCAACTGCGCAAC<br><br>Reverse:<br>GGGACTCTGACCTCGGAGAG    |
| <i>Pcyt1b</i> qPCR primer | Foward:<br>GTCAGGGTCTTGCGTGAGAA<br><br>Reverse:<br>CTGGGCATATCAAGCTGCCT    |

|                                               |                                                                           |
|-----------------------------------------------|---------------------------------------------------------------------------|
| <i>Pcyt2</i> qPCR primer                      | Foward:<br>ATCTCCTGGCTGCTGTGATG<br><br>Reverse:<br>AGGCTGGGAGGTACAGAGAG   |
| <i>Pemt</i> qPCR primer                       | Foward:<br>CTCCCATCTCGCTACCCACAT<br><br>Reverse:<br>CTGTGGAGGCTTCGGCAATA  |
| <i>Chka</i> qPCR primer                       | Foward:<br>GTTCTCCTGGCCTTCCAACA<br><br>Reverse:<br>CGAGAACCTGAGGTCATTGCT  |
| <i>Chkb</i> qPCR primer                       | Foward:<br>GGAGGCTCCAGGAGAACTTGA<br><br>Reverse:<br>ATCAGTCGGTACTCCCTGGCA |
| <i>Gapdh</i> qPCR primer                      | Foward:<br>GGAGAGTGTTTCCTCGTCCC<br><br>Reverse:<br>ATGAAGGGGTCGTTGATGGC   |
| <b>Sequence for PCR primers in T7E1 assay</b> |                                                                           |
| <i>Lipin1</i> PCR primer for T7E1 assay       | Foward:<br>CTGGGGTGCTGCTTGTGTTA<br><br>Reverse:<br>GGGCTTCTGAACTAGGCCAT   |
| <i>Dgat1</i> PCR primer for T7E1 assay        | Foward:<br>CCTGACTGCAGTTGGTTTCT<br><br>Reverse:<br>CCTGTAAAACAGTGGCTGGT   |
| <i>Dgat2</i> PCR primer for T7E1 assay        | Foward:<br>TTTCCCATGCTGCCCGTAGC<br><br>Reverse:<br>TGGTACGAGGAACCCGACC    |

**Table S5. Sequence information of PCR primers, Related to Figure 1, Figure 4, Figure 5 and Figure 6.**
